# Supplementary material for: RIC-3 phosphorylation enables dual regulation of excitation and inhibition of Caenorhabditis elegans muscle
Source: PubMed Central journal article supplement — Mol Biol Cell. 2016 Oct 1;27(19):2994–3003. doi: 10.1091/mbc.E16-05-0265 (PMC5042584; doi:10.1091/mbc.e16-05-0265), 2016-10-01
Supplement: supp_E16-05-0265v1_CombinedSupMats.pdf [file supp_E16-05-0265v1_CombinedSupMats.pdf]

# Supplemental Materials

*Molecular Biology of the Cell*

Safdie et al.

## Supplemental Figure 1.

*αRIC-3*

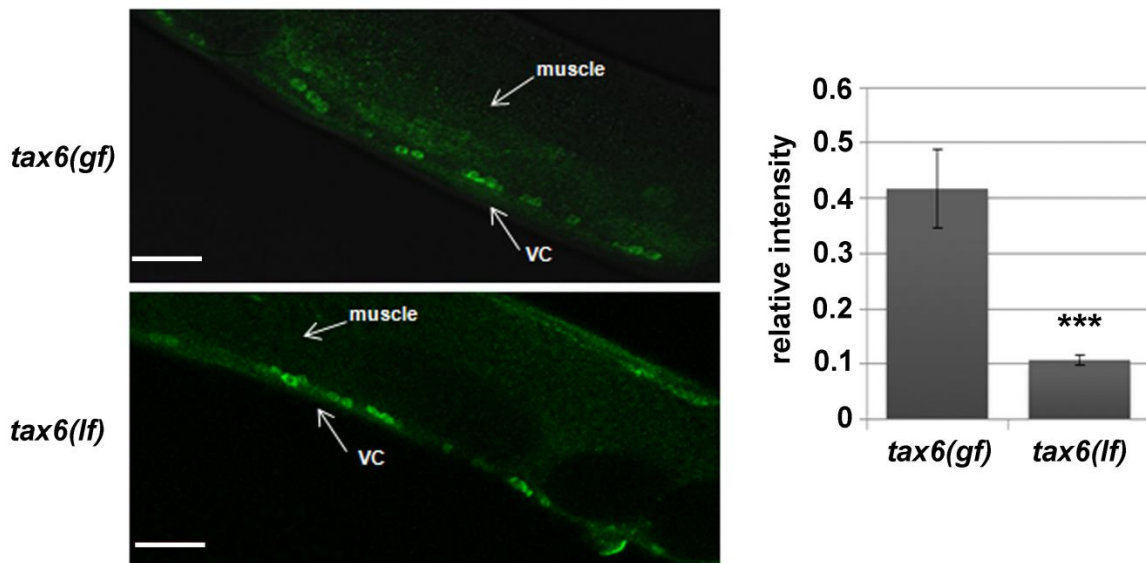

**Figure 1.** Effects of TAX-6 gain of function on RIC-3 quantity and distribution.

Quantity of RIC-3 as seen using immunohistochemistry in muscles expressing *tax-6(gf)*

relative to *tax-6(lf)*. Left, representative images of muscles and neurons, scale bar 20  $\mu$ m.

Indicated by arrows are positions of ventral cord neurons (VC) and of muscle. Right, average

intensity given relative to neurons from the same animal n=7 animals from each strain, \*\*

p<0.01.

## Supplemental Table 1.

| Protein | locus                            | Role                                      | Phosphorylation sites            | Ref. |
|---------|----------------------------------|-------------------------------------------|----------------------------------|------|
| UNC-29  | T08G11.5                         | L-AChR subunit                            | --                               | (1)  |
| UNC-38  | F21F3.5                          | L-AChR subunit                            | S404                             | (1)  |
| UNC-63  | Y110A7A.3                        | L-AChR subunit                            | --                               | (1)  |
| LEV-1   | F09E8.7                          | L-AChR subunit                            | S375                             | (1)  |
| LEV-8   | C35C5.5                          | L-AChR subunit                            | --                               | (1)  |
| ACR-8   | ZC504.2                          | L-AChR subunit<br>Alternative             | --                               | (2)  |
| RIC-3   | T14A8.1                          | ER-resident chaperone<br>of L-AChR        | S164, S171, S327<br>T328, S329   | (3)  |
| UNC-50  | T07A5.2                          | Golgi, trafficking of L-AChR<br>of L-AChR | S15                              | (4)  |
| UNC-74  | ZK973.11                         | Protein disulphide isomerase<br>of L-AChR | --                               | (1)  |
| MOLO-1  | F09F7.1                          | Auxiliary subunit of L-AChR               | --                               | (5)  |
| NRA-2   | T05f1.1                          | Subunit choice for L-AChR                 | --*                              | (2)  |
| NRA-4   | C02E11.1                         | Subunit choice for L-AChR                 | --*                              | (2)  |
| LEV-9   | T07H6.5                          | Synaptic clustering of L-AChR             | --                               | (6)  |
| LEV-10  | Y105E8A.7                        | Synaptic clustering of L-AChR             | --                               | (7)  |
| OIG-4   | R07G3.9                          | Synaptic clustering of L-AChR             | --                               | (8)  |
| UNC-49  | T21C12.1                         | GABA <sub>A</sub> receptor                | --                               | (9)  |
| NLG-1   | C40C9.5a<br>C40C9.5b<br>C40C9.5c | Synaptic localization GABA <sub>A</sub>   | S780, T786<br>S780<br>S827, T833 | (10) |
| UNC-40  | T19B4.7                          | Synaptic localization GABA <sub>A</sub>   | --                               | (11) |
| NRX-1   | C29A12.4                         | Synaptic localization GABA <sub>A</sub>   | --                               | (10) |
| FRM-3   | H05G16.1                         | Synaptic localization GABA <sub>A</sub>   | S787, S788, S857,<br>S865        | (10) |
| LIN-2A  | F17E5.1                          | Synaptic localization GABA <sub>A</sub>   | --                               | (10) |
| MADD-4B | F53B6.2                          | Synaptic localization GABA <sub>A</sub>   | --*                              | (11) |

**Table 1.** Phosphorylation sites in muscle expressed receptor subunit and protein affecting their function \* Genes not found in [www.phosida.com](http://www.phosida.com)

## References

1. Boulin, T., Gielen, M., Richmond, J. E., Williams, D. C., Paoletti, P., and Bessereau, J. L. (2008) Eight genes are required for functional reconstitution of the *Caenorhabditis elegans* levamisole-sensitive acetylcholine receptor. *Proc. Natl. Acad. Sci. USA* **105**, 18590-18595
2. Almedom, R. B., Liewald, J. F., Hernando, G., Schultheis, C., Rayes, D., Pan, J., Schedletzky, T., Hutter, H., Bouzat, C., and Gottschalk, A. (2009) An ER-resident membrane protein complex regulates nicotinic acetylcholine receptor subunit composition at the synapse. *EMBO J.* **28**, 2636-2649
3. Halevi, S., McKay, J., Palfreyman, M., Yassin, L., Eshel, M., Jorgensen, E., and Treinin, M. (2002) The *C. elegans* ric-3 gene is required for maturation of nicotinic acetylcholine receptors. *EMBO J.* **21**, 1012-1020
4. Eimer, S., Gottschalk, A., Hengartner, M., Horvitz, H. R., Richmond, J., Schafer, W. R., and Bessereau, J. L. (2007) Regulation of nicotinic receptor trafficking by the transmembrane Golgi protein UNC-50. *EMBO J.* **26**, 4313-4323

5. Boulin, T., Rapti, G., Briseño-Roa, L., Stigloher, C., Richmond, J. E., Paoletti, P., and Bessereau, J. L. (2012) Positive modulation of a Cys-loop acetylcholine receptor by an auxiliary transmembrane subunit. *Nat Neurosci* **15**, 1374-1381
6. Gendrel, M., Rapti, G., Richmond, J. E., and Bessereau, J. L. (2009) A secreted complement-control-related protein ensures acetylcholine receptor clustering. *Nature* **461**, 992-996
7. Gally, C., Eimer, S., Richmond, J. E., and Bessereau, J. L. (2004) A transmembrane protein required for acetylcholine receptor clustering in *Caenorhabditis elegans*. *Nature* **431**, 578-582
8. Rapti, G., Richmond, J., and Bessereau, J. L. (2011) A single immunoglobulin-domain protein required for clustering acetylcholine receptors in *C. elegans*. *EMBO J* **30**, 706-718
9. Bamber, B. A., Beg, A. A., Twyman, R. E., and Jorgensen, E. M. (1999) The *Caenorhabditis elegans* unc-49 locus encodes multiple subunits of a heteromultimeric GABA receptor. *J Neurosci* **19**, 5348-5359
10. Tong, X. J., Hu, Z., Liu, Y., Anderson, D., and Kaplan, J. M. (2015) A network of autism linked genes stabilizes two pools of synaptic GABA<sub>A</sub> receptors. *Elife* **4**
11. Tu, H., Pinan-Lucarré, B., Ji, T., Jospin, M., and Bessereau, J. L. (2015) *C. elegans* Punctin Clusters GABA(A) Receptors via Neuroligin Binding and UNC-40/DCC Recruitment. *Neuron* **86**, 1407-1419

## Supplemental Table 2.

| Site          | Scansite              | Phosida                           |
|---------------|-----------------------|-----------------------------------|
| <b>Ser164</b> | Casein Kinase II      | No matching motif                 |
| <b>Ser171</b> | Casein Kinase I or II | Casein Kinase II                  |
| <b>Ser327</b> | Not identified        | Casein Kinase II or CaM Kinase II |
| <b>Thr328</b> | Not identified        | Casein Kinase II                  |
| <b>Ser329</b> | Casein Kinase II*     | Casein Kinase II                  |

\* medium stringency (other sites predicted at high stringency).

**Table 2.** Predicted kinases for RIC-3 phosphorylation sites.
